# Supplementary material for: Service selection in web service compositions optimizing energy consumption and service response time
Source: Springer Nature journal article supplement (doi:10.1186/1869-0238-4-19), 2013-01-01
Supplement: 13174_2013_19_MOESM1_ESM.pdf [file 13174_2013_19_MOESM1_ESM.pdf]

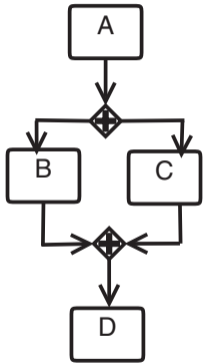

a) *Single BPMN process*

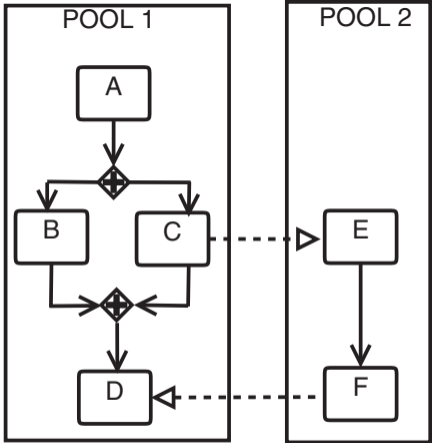

b) *Multiple BPMN processes*
