# Supplementary material for: Service selection in web service compositions optimizing energy consumption and service response time
Source: Springer Nature journal article supplement (doi:10.1186/1869-0238-4-19), 2013-01-01
Supplement: 13174_2013_19_MOESM2_ESM.pdf [file 13174_2013_19_MOESM2_ESM.pdf]

**OPERATIONS  
AND BUSINESS PROCESSES**

**WEB SERVICES**

**MACHINES**

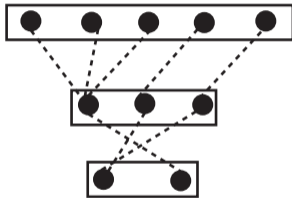

a) *Layers view of a WSC graph*

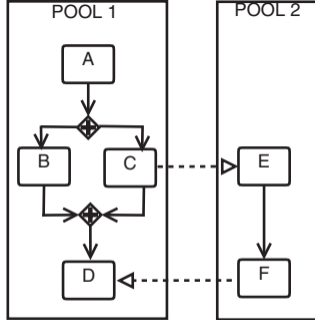

b) *Operations view*
