# Supplementary material for: Service selection in web service compositions optimizing energy consumption and service response time
Source: Springer Nature journal article supplement (doi:10.1186/1869-0238-4-19), 2013-01-01

#Infeasible cases

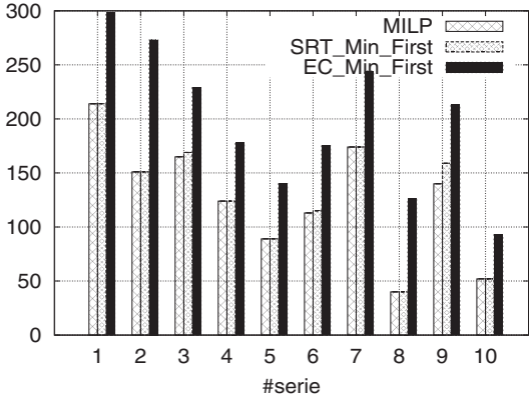

Supplement: 13174_2013_19_MOESM7_ESM.pdf [file 13174_2013_19_MOESM7_ESM.pdf]
